# Supplementary material for: The Contribution of Mosaic Variants to Autism Spectrum Disorder
Source: PLoS Genet. 2016 Sep 15;12(9):e1006245. doi: 10.1371/journal.pgen.1006245 (PMC5024993; doi:10.1371/journal.pgen.1006245)
Supplement: S12 Table — Odds ratios of less than 1 indicate mosaic variants are relatively depleted for those events while odds ratios of greater than 1 indicate relative enrichment. p values were calculated using a Fisher’s exact test. (XLSX) [file pgen.1006245.s016.xlsx]

## Sheet: Variant Properties
Mutation Type	Odds Ratio	p-value
transition	0.88	0.2647
transversion	1.1	0.5028
insertion	0.83	1
deletion	2.49	0.000524
CpG	1.1	0.5062
