# Supplementary material for: The Contribution of Mosaic Variants to Autism Spectrum Disorder
Source: PLoS Genet. 2016 Sep 15;12(9):e1006245. doi: 10.1371/journal.pgen.1006245 (PMC5024993; doi:10.1371/journal.pgen.1006245)
Supplement: S15 Table — Column A describes mutation type and individual classes used in the analysis. Columns B through G describe the results of the recurrence analysis. Columns H though O describe gene target enrichment analysis. (XLSX) [file pgen.1006245.s019.xlsx]

## Sheet: set_analysis
class	nEvents	nGenes	recGenesN	recGenesExp	recGenesPval	recHits	set_FMRPTargets	set_PSD	set_Embryonic	set_ChromatinModifiers	set_EssentialGenes	set_MendelianDiseaseGenes	set_DeNovoLGDsInSchizoprenia	set_DeNovoLGDsInID
dnv_mos_functional_prb	98	98	0	0.51	1	0	6 (9.46, 0.30384)	10 (9.10, 0.72682)	18 (12.57, 0.12817)	3 (3.29, 1.00000)	15 (11.92, 0.35185)	3 (2.24, 0.49327)	1 (1.03, 1.00000)	0 (0.33, 1.00000)
dnv_mos_functional_sib	54	52	2	0.16	0.0098	4	5 (5.02, 1.00000)	8 (4.83, 0.14541)	9 (6.67, 0.30267)	2 (1.74, 0.69389)	4 (6.32, 0.40126)	1 (1.19, 1.00000)	0 (0.55, 1.00000)	0 (0.17, 1.00000)
dnv_nm_LGD_prb	200	192	8	2.09	0.0007	16	30 (18.53, 0.00957)	23 (17.82, 0.21182)	32 (24.62, 0.12944)	14 (6.44, 0.00712)	32 (23.35, 0.06041)	4 (4.40, 1.00000)	6 (2.01, 0.01647)	5 (0.64, 0.00051)
dnv_nm_LGD_sib	99	99	0	0.54	1	0	6 (9.56, 0.30490)	13 (9.19, 0.22135)	11 (12.70, 0.76324)	3 (3.32, 1.00000)	8 (12.04, 0.28002)	2 (2.27, 1.00000)	1 (1.04, 1.00000)	1 (0.33, 0.28165)
